# Supplementary material for: Single gold nanoparticle-driven heme cofactor nanozyme as an unprecedented oxidase mimetic
Source: Royal Society of Chemistry journal article supplement (doi:10.1039/d1cc00279a), 2021-01-01
Supplement: d1cc00279a1.pdf [file d1cc00279a1.pdf]

## **Supporting Information**

### **Single Gold Nanoparticle-driven Heme Cofactor Nanozyme as Unprecedented Oxidase Mimetic**

Yan Liu,\* Zhen Chen, Zhifang Shao and Rong Guo\*

School of Chemistry and Chemical Engineering, Yangzhou University, Yangzhou,  
225002, Jiangsu, P. R. China

Email: yanliu@yzu.edu.cn, guorong@yzu.edu.cn, Phone/fax: +86-514-87971802.

## **Experimental section**

**Materials.** Sodium borohydride ( $\text{NaBH}_4$ ), NaOH, Hydrogen tetrachloroaurate tetrahydrate ( $\text{HAuCl}_4 \cdot 3\text{H}_2\text{O}$ , 99%), sodium acetate, and acetic acid were obtained from Sinopharm Chemical Reagent Co., Ltd. (Shanghai, China). Hemin, 3,3',5,5'-tetramethylbenzidine (TMB), 2,2'-azinobis (3ethylbenzthiazoline-6-sulfonic acid) diammonium salt (ABTS) were purchased from Sigma-Aldrich, Hydroethidine (DHE), FCLA Free Acid were from J&K Scientific. The ultrapure water was prepared with Milli-Q system (18.2  $\text{M}\Omega \text{ cm}$ ).

**Instrumentation and Characterization.** The transmission electron microscopy (TEM) characterizations were detected by Tecnai 12(Philips, Netherlands). Fourier transform infrared (FT-IR) spectra of samples were measured in the range 400-4000  $\text{cm}^{-1}$  using Cary 610/670 FT-IR spectrophotometer (Variann, USA). X-ray photoelectron spectroscopy (XPS) analysis was performed by ESCALAB 250Xi spectrometer (Thermo Fisher, USA), UV-vis spectra were tested by Lambda 650 (PerkinElmer, USA). The fluorescence spectra were recorded with a F-7000 fluorescence spectrophotometer (Hitachi, Japan). Ultrapure water was obtained by a Milli-Q purification system (Millipore, MA).

**Synthesis of Heme-AuNPs.** 0.5 mM  $\text{HAuCl}_4$  and 10  $\mu\text{L}$  1M NaOH were added in 5 mL water, followed by adding 1.2 mM  $\text{NaBH}_4$  solution under vigorous stirring for 30 min. Then, AuNPs was stored at 4  $^\circ\text{C}$  in refrigerator. Hemin with different concentration was added the obtained Au colloid under magnetic stirring. 10 min later, the Heme-AuNP hybrid was obtained and stored at 4  $^\circ\text{C}$ . Heme-AuNPs were purified by dialysis before use.

**Oxidase-like Activity of Heme-AuNP.** The oxidase-like activity of Heme-AuNPs was measured by a classical colorimetric assay with TMB as the substrate. In a typical experiment, 150  $\mu\text{L}$  of Heme-AuNPs, 2754  $\mu\text{L}$  of acetate buffer solution (0.2 M, pH 3.5), 96  $\mu\text{L}$  of 25 mM TMB were added into a 5 mL tube. After incubation for 30 min at 35  $^\circ\text{C}$ , the UV-vis spectrum of the system was monitored by Lambda 650 spectrophotometer.

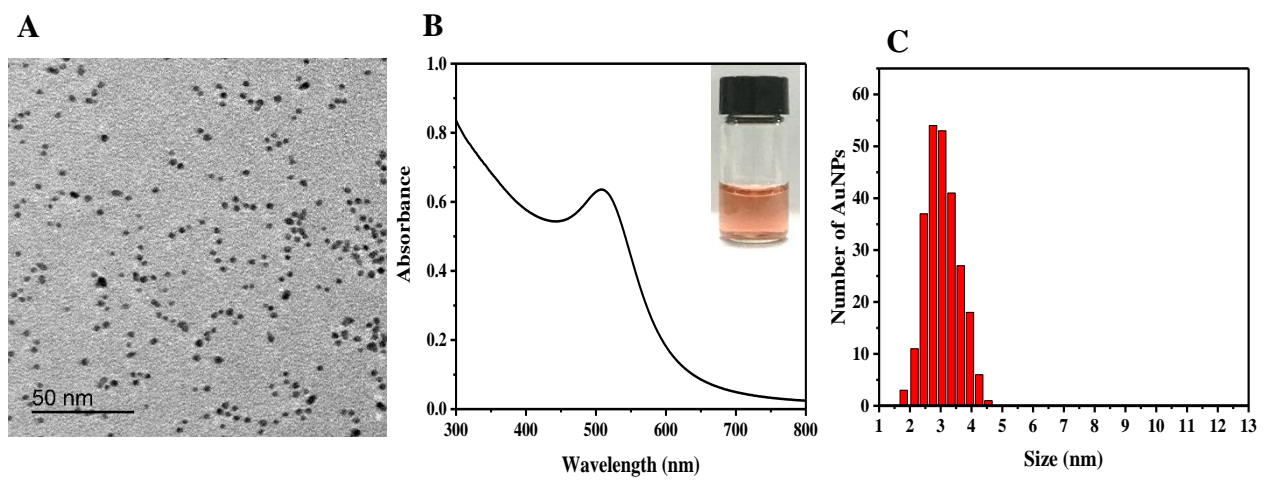

**Fig. S1** TEM image (A) and UV-vis spectrum (B) of AuNPs. (C) The size distribution histogram for AuNP shown in A.

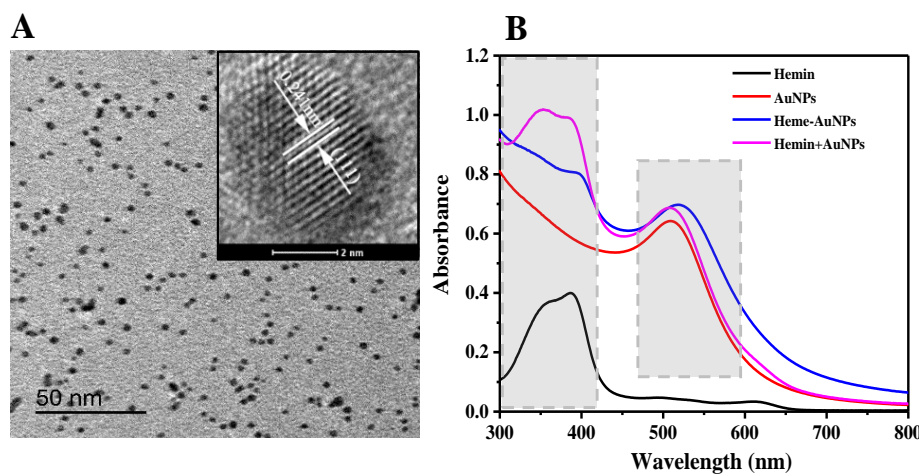

**Fig. S2** TEM image (A) and the inset being the HRTEM image of AuNPs. (B) UV-vis spectra of AuNP, hemin, Heme-AuNP and hemin + AuNP.

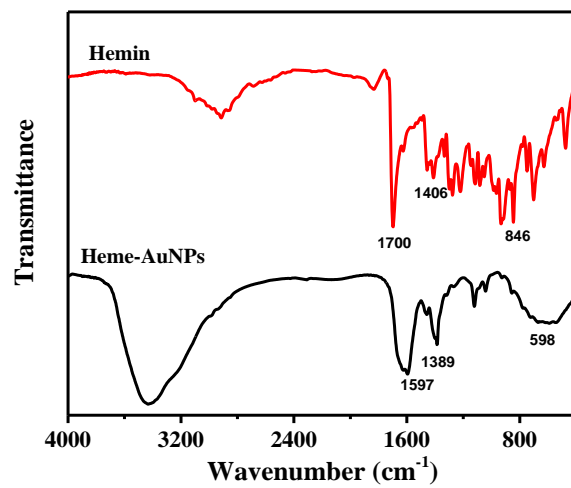

**Fig. S3** FT-IR spectra of hemin and Heme-AuNP.

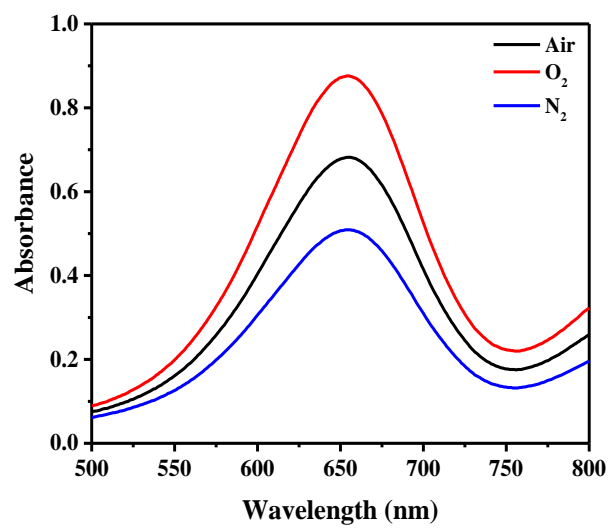

**Fig. S4** UV-vis spectra of the oxidation of TMB catalyzed by Heme-AuNPs with testing solutions saturated by air, oxygen and nitrogen gases.

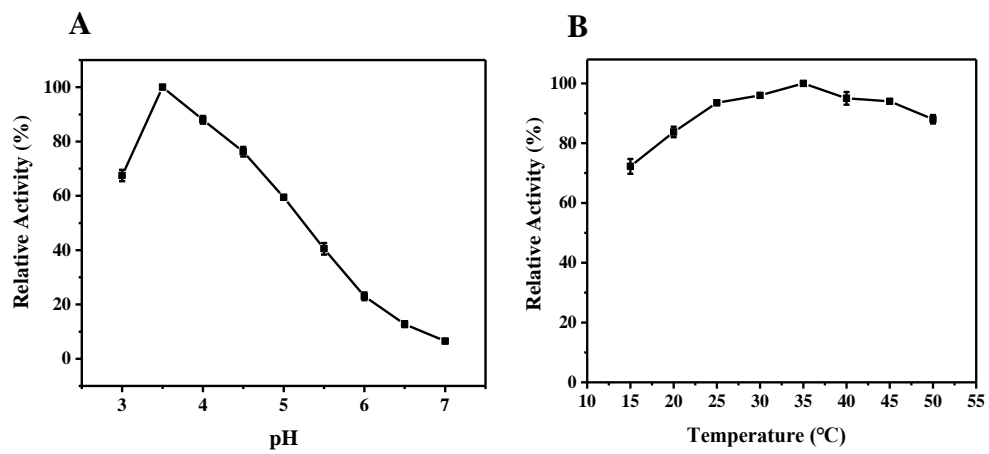

**Fig. S5** Effect of pH (A) and temperature (B) on the oxidase-like activity of Heme-AuNPs.

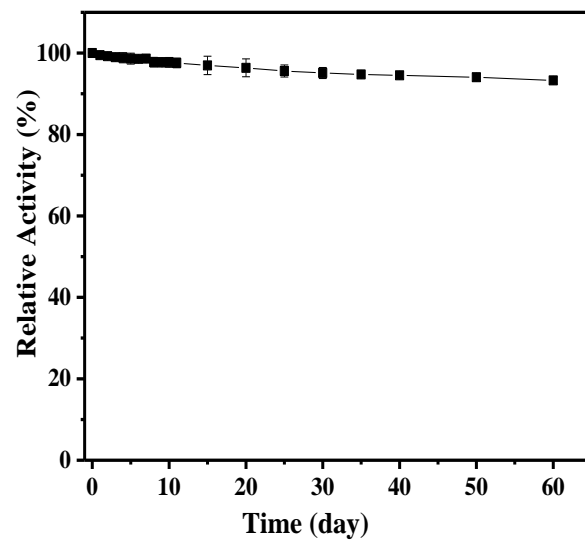

**Fig. S6** The oxidase-like activity of Heme-AuNPs after stored for different time.



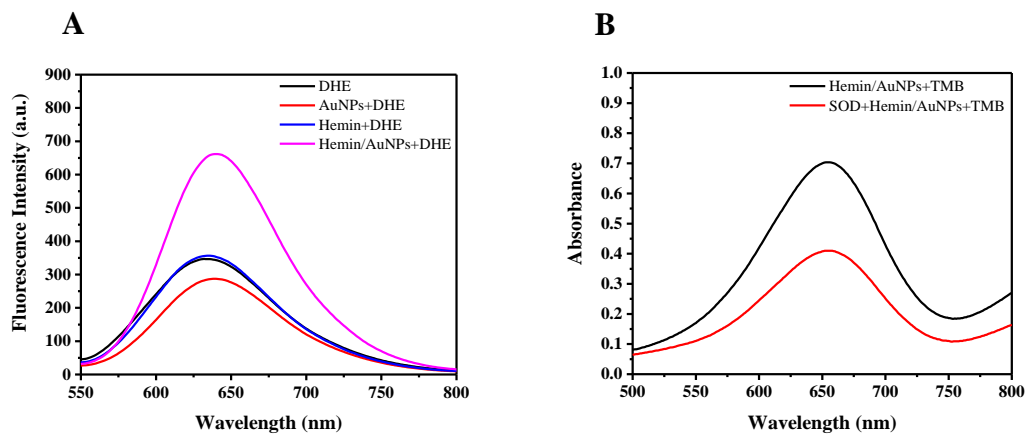

**Fig. S7** (A) Fluorescent emission spectra of dihydroethidium to detect  $O_2^{\cdot-}$  radicals. (B) Effect of SOD on the catalytic oxidation of TMB by Heme-AuNPs.

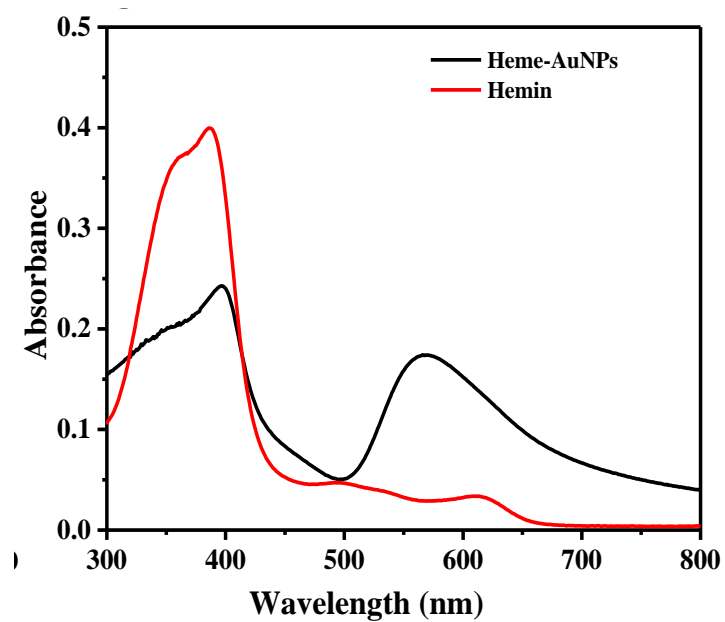

**Fig. S8** The UV-vis spectra of heme without (red) and with AuNPs (black), [hemin] = 2.5  $\mu$ M. The UV-vis spectrum of Heme-AuNPs was obtained with AuNP used as a reference.

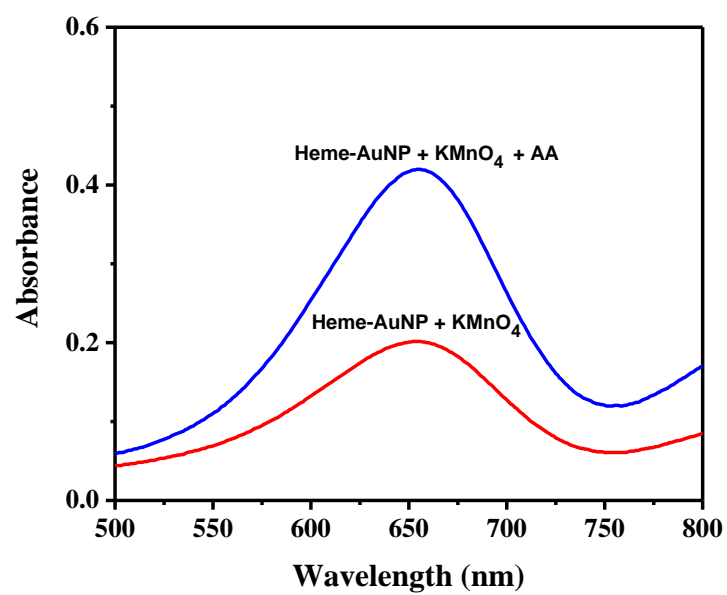

**Fig. S9** Effect of AA on the oxidase-like activity of Heme-AuNPs treated with KMnO<sub>4</sub>.

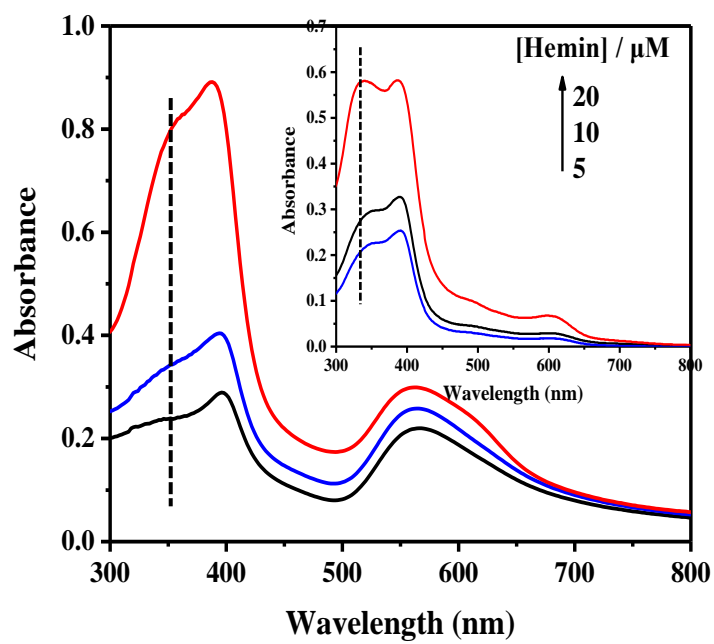

**Fig. S10** UV-vis spectra profile of heme with different concentration with AuNPs, inset being the UV-vis spectra profile of hemin with different concentrations without AuNPs.

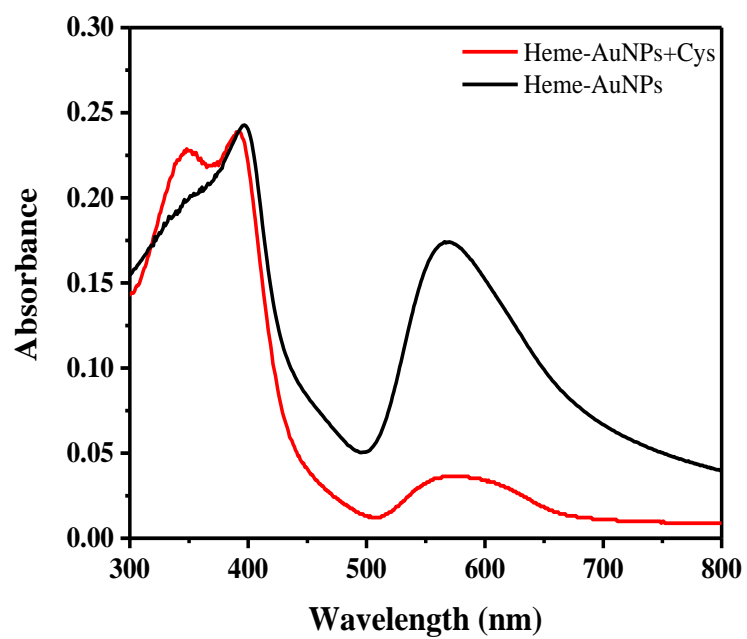

**Fig. S11** The UV-vis spectra of heme in the presence of AuNPs (black) and of AuNP solution containing Cys (red).

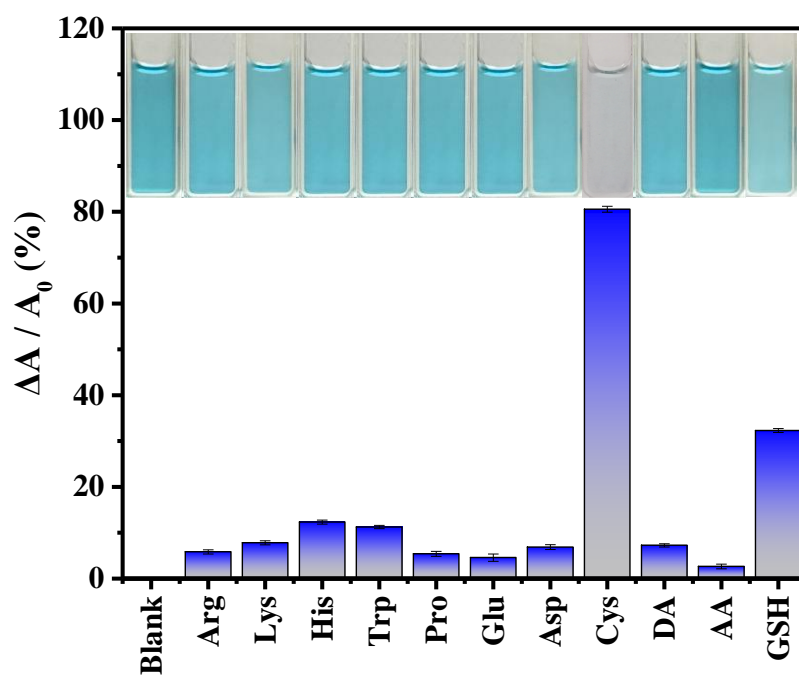

**Fig. S12** The oxidase-like activity of Heme-AuNP in the presence of different 2.0  $\mu\text{M}$  biomolecules.

Table S1. Comparison of the apparent Michaelis-Menton constant ( $K_m$ ) and maximum reaction rate ( $V_{max}$ ) of Heme-AuNP and other nanozymes.

| Nanozyme                | $K_m$ (mM) | $V_{max}$ ( $10^{-8}$ M s $^{-1}$ ) | Reference |
|-------------------------|------------|-------------------------------------|-----------|
| His@AuNCs               | 0.041      | 6.21                                | 1         |
| Nanoceria               | 0.42       | 10.04                               | 2         |
| Fe-N-C single-atom      | 1.81       | 0.0601                              | 3         |
| FeN <sub>5</sub> SA/CNF | 0.148      | 75.8                                | 4         |
| PSMOF                   | 0.165      | 13.9                                | 5         |
| Heme-AuNPs              | 0.168      | 1.68                                | This Work |

Table S2. Comparison of different methods for cysteine detection based on nanozymes.

| Nanozymes                             | Liner Range | LOD      | Mimetic Enzyme | Reference |
|---------------------------------------|-------------|----------|----------------|-----------|
| PtNPs/GO                              | 25~5000 nM  | 1.2 nM   | Peroxidase     | 6         |
| CuMnO <sub>2</sub> nanoflake          | 25~300 μM   | 11.26 μM | Peroxidase     | 7         |
| Pd NPs/CeO <sub>2</sub> nanotube      | 6~40 nM     | 2.9 nM   | Peroxidase     | 8         |
| Asp/Ce-nanotube                       | 0.08~10 μM  | 33.2 nM  | Peroxidase     | 9         |
| FeCo-CNFs                             | 1~20 μM     | 0.15 μM  | Peroxidase     | 10        |
| VS <sub>4</sub> submicrospheres       | 5~100 μM    | 2.5 μM   | Peroxidase     | 11        |
| POMOF/SWNT nanocomposites             | 1~80 μM     | 0.103 μM | Peroxidase     | 12        |
| Mo-Co <sub>3</sub> O <sub>4</sub> NTs | 0.05~10 μM  | 24.2 nM  | Peroxidase     | 13        |
| MoS <sub>2</sub> -QDs-AgNPs           | 1~100 μM    | 824 nM   | Oxidase        | 14        |
| Heme-AuNPs                            | 15~750 nM   | 10 nM    | Oxidase        | This Work |



## References

- 1 L. Liu, J. Du, W. Liu, Y. Guo, G. F. Wu, W. Qi and X. Lu, *Anal. Bioanal. Chem.*, 2019, **411**, 2189-2220.
- 2 H. Cheng, S. Lin, F. Muhammad, Y. Lin and H. Wei, *ACS Sens.*, 2016, **1**, 1336-1343.
- 3 Y. Wu, L. Jiao, X. Luo, W. Xu, X. Wei, H. Wang and H. Yan, *Small*, 2019, **15**, 1903108-1903115.
- 4 L. Huang, J. Chen, L. Gan, J. Wang and S. Dong, *Sci. Adv.*, 2019, **5**, eaav5490.
- 5 Y. Liu, M. Zhou, W. Cao, X. Wang, Q. Wang, S. Li and H. Wei, *Anal. Chem.*, 2019, **91**, 8170-8175.
- 6 X. Lin, H. Deng, G. Wu, H. Peng, A. Liu, X. Lin, X. Xia and W. Chen, *Analyst*, 2015, **140**, 5251-5256.
- 7 Y. Chen, T. Chen, X. Wu and G. Yang, *Sensor. Actuat. B-Chem.*, 2019, **279**, 374-384.
- 8 X. Li, Z. Pu, H. Zhou, W. Zhang, X. Niu, Y. He, X. Xu, F. Qiu, J. Pan and L. Ni, *J. Mater. Sci.*, 2018, **53**, 13912-13923.
- 9 Y. Li, Z. Zhang, Z. Tao, X. Gao, S. Wang and Y. Liu, *Talanta*, 2019, **196**, 556-562.
- 10 Z. Yang, Y. Zhu, G. Nie, M. Li, C. Wang and X. Lu, *Dalton T.*, 2017, **46**, 8942-8949.
- 11 C. Chen, Y. Wang and D. Zhang, *Microchim. Acta.*, 2019, **186**, 784-791.
- 12 X. Li, X. Yang, J. Sha, T. Han, C. Du, Y. Sun and Y. Lan, *ACS Appl. Mater. Inter.*, 2019, **11**, 16896-16904.
- 13 M. Gao, X. Lu, S. Chen, D. Tian, Y. Zhu and C. Wang, *ACS Appl. Nano Mater.*, 2018, **1**, 4703-4715.
- 14 R. P. Ojha, R. Mishra, P. Singh, N. R. Nirala and R. Prakash, *Microchim. Acta.*, 2020, **187**, 74-82.
